## Article

# The effects of patient education on patient safety: can we change patient perceptions and attitudes?: Lessons from the Armed Forces Capital Hospital in Korea

JINOK AN<sup>1,†</sup>, SEUNG JU KIM<sup>2,3,†</sup>, SOHEE PARK<sup>3,4</sup>, KI TAE MOON<sup>5</sup>,  
and EUN-CHEOL PARK<sup>3,6</sup>

<sup>1</sup>Department of Nurses, Armed Forces Capital Hospital, 81, Saemaeul-ro 117beon-gil, Bundang-gu, Seongnam 13574, Republic of Korea, <sup>2</sup>Department of Public Health, Graduate School, Yonsei University, 50 Yonsei-ro, Seodaemun-gu, Seoul 03722, Republic of Korea, <sup>3</sup>Institute of Health Services Research, Yonsei University, 50 Yonsei-ro, Seodaemun-gu, Seoul 03722, Republic of Korea, <sup>4</sup>Department of Biostatistics, Graduate School of Public Health, Yonsei University, 50 Yonsei-ro, Seodaemun-gu, Seoul 03722, Republic of Korea, <sup>5</sup>National Evidence-Based Healthcare Collaborating Agency, 173, Toegye-ro, Jung-gu, Seoul 04554, Republic of Korea, and <sup>6</sup>Department of Preventive Medicine, Yonsei University College of Medicine, 50 Yonsei-ro, Seodaemun-gu, Seoul 03722, Republic of Korea

Address reprint requests to: Eun-Cheol Park, Department of Preventive Medicine & Institute of Health Service Research, Yonsei University College of Medicine, 50 Yonsei-ro, Seodaemun-gu, Seoul 03722, Republic of Korea. Tel: +82-2-2228-1862; Fax: +82-02-392-8133, E-mail: ecpark@yuhs.ac

<sup>†</sup>Co-first authors.

Editorial Decision 14 March 2017; Accepted 16 March 2017

## Abstract

**Objective:** Strategies to promote patient involvement in medical error prevention have been implemented, but little is known about the effects of education on changes in perceptions and attitudes about patients' own safety.

**Design:** We administered a survey to military personnel admitted to the Armed Forces Capital Hospital. Responses were classified according to perception and attitude.

**Setting:** Single military hospital in Korea.

**Participants:** A total of 483 completed surveys were included in our study; 252 of the respondents received safety education at admission.

**Methods:** We provided educational program material to one-half of the patients at admission (intervention group). The other one-half of patients received no safety education (non-intervention group). We then performed two rounds of a self-administered survey, based on whether the patient received patient safety education. Cronbach's alpha was calculated to determine scale score reliability. Regression analysis was used to evaluate associations between education and change in scores.

**Results:** Scores for perception and attitude were greater in the intervention group. The results of the regression analysis revealed that compared with the non-intervention respondents, the respondents who received education had higher perception (estimate: 7.809,  $P < 0.0001$ ) and attitude scores (estimate: 5.539,  $P < 0.0001$ ).

**Conclusion:** Our study results suggested that patient education was associated with higher scores in both perception and attitudes about safety. To improve patient engagement in this area, efficient

methods that encourage patient empowerment should be developed. Specialized health care providers who provide patient level education are needed to achieve a satisfactory patient safety climate.

**Key words:** patient safety, patient education, surveys

## Introduction

Since a report released by the Institute of Medicine (IOM) in 1999, perceptions about patient safety have received significant attention in the area of health care [1, 2]. Health care providers, policy makers and others now recognize the importance of patient safety. The concept of error and failure in health care delivery has been suggested as part of a strategy to protect patients from adverse events [3, 4]. This concept is structurally complex and consists of multifaceted processes that are associated with patient outcomes. Concept-related factors associated with patient safety and interventions for improvements in the safety climate have been suggested. Some study results suggest that hospital characteristics such as the organizational culture and the in-hospital safety climate are important for improvements in patient safety [5–7]. Other study results suggest that the role of the health care providers in assuring patient safety, and changes in their perceptions, are associated with health outcome improvements [8–10]. The external factors surrounding the patient are important for safety, but the patient as a key factor affecting improvements in health care should not be ignored [11, 12].

Recently, ‘patient-centeredness’ has been considered as important for improvements in health care [13]. Broad construct is one of the various ways that this concept has been described; broad construct includes the patient’s role and responsibility [14]. This concept implies that the patient can choose personally meaningful and realistic goals and act spontaneously during the health care process. The patient is willing to participate and engage in their own safety and changes in behavior to prevent medical errors. The objective is achieved via patient empowerment; self-direction for improvements in health is facilitated [15]. To promote patient empowerment, appropriate interventions, including information and education, have been considered as important components of the methodology [16]. Patient involvement in safety is associated with better patient outcomes [17, 18]. Some study results have suggested that an educational program is associated with patient empowerment [19, 20]. However, other results have suggested that there are no positive effects of education that promote patient empowerment [21, 22]. Although many study results suggest that education is associated with improvements in patient empowerment, there is a lack of evidence about whether education can improve patient perceptions and attitude. The effects of education also vary by individuals’ characteristics and would be different in specific groups, such as military personnel [23, 24].

Korea has a conscription-based military system. Individuals enter the Korean army within a specific age range (i.e. 18–28 years). Members of the conscripted groups are young, easily accept (i.e. obey) an order, and have a high level of education. The expected effects of education are greater compared with the general population. Conscriptees are discharged from the army when the service term is finished, but the knowledge acquired while in the army would be expected to have life-long effects. Military personnel are, therefore, considered to be important subjects for intervention.

The aim of our study was to evaluate the effects of safety education on patient perceptions and attitudes toward safety in military

personnel. We included analysis of clinical severity, medical department and education to identify individuals potentially susceptible to the effects of education.

## Materials and methods

### Study participants and data collection

The survey is designed as a quasi-experimental study. We performed two rounds of distribution of a self-administered survey to inpatients based on whether or not the patient received patient safety education. First, we distributed the survey from 11 December 2015 to 18 December 2015 to patients who were hospitalized during this period. Second, we performed 4 weeks of patient education (21 December 2015 to 15 January 2016) and distributed the survey to these patients during the period of 18 January 2016 to 22 January 2016. All of the survey participation was voluntary; individuals agreed or declined to participate after we provided information about the study. A total of 308 participants (first round, patients who did not receive education) and 285 participants (second round, patients who received education) were included in the study population. Overall, 48 of these respondents completed the survey during the first and second rounds. We excluded the results of these patients from the overall analysis and evaluated their responses separately (Appendix). Surveys from 14 respondents who did not answer all of the questions were also excluded from the analysis. Data from a total of 483 participants (first round: 252; second round: 231) were included in the analysis.

### Patient safety education

The education process was performed in phases (i.e. (i) introduction (5 min): purpose of the education, (ii) video (5 min): patient rights information, (iii) education (10 min): the role of the patient and a safe medical environment, using power-point data and (iv) finish (10 min): provide pamphlet and explanation about pamphlet to the patient). We also provided time to freely discuss patient safety after the education was finished. We considered that this phase would be motivating to the patients because they were sharing knowledge with each other; we encouraged between-patient discussions. Registered ward nurses used pamphlets to provide daily additional education to patients who had difficulty receiving education because of movement limitations.

### Questionnaire

We reviewed results of questionnaires that included patient safety topics and changed the wording of the perception and attitude questions to make the items more applicable to the patient [25–28]. The perception and attitude about patient safety questions consisted of 10 items containing questions. We limited the number of survey items for several reasons. First, we wanted to provide questions that were easy for the patient to answer. Second, increased numbers of items in a survey may reduce response rates. Third, we wanted to

reduce survey-related pressure. The Likert scale (1 = disagree strongly, 2 = disagree slightly, 3 = neutral, 4 = agree slightly, 5 = agree strongly) was used to score each of a total of 20 items. Negatively worded items were reverse-scored to matched the direction of the positively worded items. A score of 50 was the total value that could be assigned to each section. The survey also included demographic and background questions (e.g. age, marital status, education level, medical department, length of stay, prior admission experience, patient clinical severity [based on first day of admission] and risk of falling) (Appendix).

### Reliability and validity analysis

The reliability of the finalized questionnaire was evaluated using Cronbach's alpha for each composite to assess the extent to which the respondents consistently answered theoretically similar items in each composite. The level of Cronbach's alpha was calculated as 0.922 and 0.714 for perception and attitude, respectively. A greater value for alpha indicated better reliability; an acceptable level was  $\geq 0.7$  [29]. The face validity of the questionnaire was assessed by patient safety specialists before it was administered. We also used a construct validity test to examine how well the questionnaire evaluated the patient's perceptions and attitudes. By most criteria, the survey showed an acceptable fit of perceptions, but poor validity for attitudes [30–32] (Appendix).

### Ethical considerations

The Institutional Review Board (IRB) of the Military Health Policy Research Center, Armed Forces Nursing Academy (IRB number: 1 044 257-201 512-HR-034-02) approved the study protocol.

### Statistical analysis

The distribution of each categorical variable was examined using an analysis of frequencies and percentages;  $\chi^2$  tests were performed to examine associations with readmission. Analysis of variance was also performed for continuous variables to compare mean and standard deviation values. In the fully adjusted model, all variables were entered simultaneously. Multiple linear regression analysis was performed to identify associations of these variables with patient safety perception and attitude, while controlling for potential confounding variables. Subgroup analyses for patient clinical severity, medical department and education level were also performed. All statistical analyses were performed using SAS statistical software version 9.4 (SAS Institute, Cary, NC, USA). A  $P < 0.05$  was considered to indicate a statistically significant difference.

## Results

A total of 483 completed surveys were included in the analysis; 252 (52.5%) of the respondents received the patient safety education. The mean age of the respondents was 23.2 years, most were unmarried ( $n = 429$ , 88.8%) and had graduated from college ( $n = 435$ , 90.1%). The proportion of patients with a greater condition of clinical severity was not high among the total respondents ( $n = 49$ , 10.1%) (Table 1).

The mean composite score was higher in patients who received education in both perception and attitude. The mean perception score was higher for the group of respondents who were admitted to the department of surgery and received education. The results for the attitude scores were similar for this group (Table 2).

The results of the regression analysis indicated that compared with the non-intervention respondents, the respondents who received education had higher perception, and attitude, scores. Respondents who were admitted to the department of internal medicine had lower scores in both perception and attitude, compared with respondents admitted to the department of surgery (Table 3).

We performed subgroup analyses by patient clinical severity, medical department and education. The results of the patient clinical severity subgroup analysis indicated that there were different magnitudes of the effect of education on patient safety for both perception and attitude. The increased score in perception was higher in patients with higher clinical severity conditions. The attitude score was higher in patients with lower clinical severity conditions. The medical department subgroup analysis revealed that the size of the effect of education on the change in score was large in respondents who were admitted to the department of internal medicine. The results of the education subgroup analysis indicated that the magnitudes of the effects were similar for both college and high school graduate respondents; only college graduate respondents had significant increases in attitude score (Fig. 1).

## Discussion

Patient safety is an important component of quality of care. Preventable medical errors can reduce unnecessary resource use and waste of health expenditures [2]. The most important thing is that the reduction of medical errors can save the patient's life [33]. Positive patient attitudes about engaging in their own safety combined with the medical staffs' efforts to improve safety can have synergistic effects. To increase patient engagement in their own safety, we provided safety education and performed a survey to evaluate changes in their perceptions and attitudes.

Overall, the patients who received education about patient safety scored significantly higher in the areas of perception and attitude. Our results suggested that education is important for improvements in patient safety perceptions and attitudes. These results were similar to the results of previous studies, which indicated that patient involvement results in the patients understanding their role and importance [34, 35]. These study results suggest that educational campaigns directed at the patient can lead to positive attitudes about their own safety and motivate changes in behavior. The results of other studies suggest that the role of the patient is limited and is a smaller part of the overall factors that affect safety [36, 37]. The traditional point of view was that the patient's role was limited; information was unbalanced and because patients are not expert in this area, they cannot actively engage in their treatment. Patient-centeredness is now important to health care providers and policy makers; these groups have recognized the importance of self-directional management to improvement in health [11, 13, 14, 20]. To reach the goal of patient-centeredness, adequate health information and health management education should be provided to the patient. Education during hospitalization should induce patients to be interested in their health and in the surrounding environment, and motivate changes in harmful behavior. These changes would motivate improvements in the independent role and the safety of the patient. However, because the changes would differ by individual characteristics, our evaluation included patient clinical severity, medical department and level of education subgroup analyses.

The subgroup analysis revealed that the effects of education on perception and attitude were different between subgroups. The increased score in perception was greater in the group of patients

**Table 1** General characteristics of respondents

(Unit: N/M, %/SD)

|                                 | Education  |            | Total       | P-value |
|---------------------------------|------------|------------|-------------|---------|
|                                 | Yes        | No         |             |         |
| Age                             | 23.6 ± 7.1 | 22.8 ± 6.4 | 23.2 ± 6.8  | 0.2216  |
| Marital status                  |            |            |             |         |
| Single                          | 219 (51.1) | 210 (49.0) | 429 (88.8)  | 0.2111  |
| Married                         | 33 (61.1)  | 21 (38.9)  | 54 (11.2)   |         |
| Education                       |            |            |             |         |
| High school                     | 24 (50.0)  | 24 (50.0)  | 48 (9.9)    | 0.8686  |
| College                         | 228 (52.4) | 207 (47.6) | 435 (90.1)  |         |
| Rank                            |            |            |             |         |
| Private                         | 47 (57.3)  | 35 (42.7)  | 82 (17.0)   | 0.5329  |
| Private first class             | 79 (54.1)  | 67 (45.9)  | 146 (30.2)  |         |
| Corporal                        | 48 (45.7)  | 57 (54.3)  | 105 (21.7)  |         |
| Specialist                      | 28 (49.1)  | 29 (50.9)  | 57 (11.8)   |         |
| Officer                         | 50 (53.8)  | 43 (46.2)  | 93 (19.3)   |         |
| Type of army                    |            |            |             |         |
| Army                            | 228 (51.7) | 213 (48.3) | 441 (91.3)  | 0.4099  |
| Air force                       | 9 (47.4)   | 10 (52.6)  | 19 (3.9)    |         |
| Navy                            | 15 (65.2)  | 8 (34.8)   | 23 (4.8)    |         |
| Medical department              |            |            |             |         |
| Department of internal medicine | 44 (54.3)  | 37 (45.7)  | 81 (16.8)   | 0.7626  |
| Department of surgery           | 208 (51.7) | 194 (48.3) | 402 (83.2)  |         |
| Length of stay                  | 10.4 ± 6.0 | 9.8 ± 5.9  | 10.1 ± 6.0  | 0.2617  |
| Surgery                         |            |            |             |         |
| Yes                             | 89 (53.3)  | 78 (46.7)  | 167 (16.8)  | 0.7931  |
| No                              | 163 (51.6) | 153 (48.4) | 316 (83.2)  |         |
| Prior admission experience      |            |            |             |         |
| Yes                             | 54 (59.3)  | 37 (40.7)  | 91 (16.8)   | 0.1607  |
| No                              | 198 (50.5) | 194 (49.5) | 392 (83.2)  |         |
| Interest in health information  |            |            |             |         |
| Low                             | 149 (50.3) | 147 (49.7) | 296 (16.8)  | 0.3561  |
| High                            | 103 (55.1) | 84 (44.9)  | 187 (83.2)  |         |
| Patient clinical severity       |            |            |             |         |
| High                            | 20 (40.8)  | 29 (59.2)  | 49 (10.1)   | 0.1265  |
| Low                             | 232 (53.5) | 202 (46.5) | 434 (89.9)  |         |
| Risk of falling                 |            |            |             |         |
| High                            | 12 (42.9)  | 16 (57.1)  | 28 (5.8)    | 0.4111  |
| Low                             | 240 (52.8) | 215 (47.3) | 455 (94.2)  |         |
| Total                           | 252 (52.2) | 231 (47.8) | 483 (100.0) |         |

N, number; M, mean; SD, standard deviation.

with higher clinical severity conditions. The effect of education on change in attitude was weaker in patients with surgery and those with at most a high school education. One plausible explanation is differences in motivation to change behavior; i.e. education might have improved perceptions, but not enough to motivate specific actions, because a change in attitude requires more powerful motivation [38, 39]. In addition, the degree of response to education is likely associated with the individual's health condition (e.g. difficult to initiate action) or other characteristics (e.g. carefully change their behavior in response to the health condition). Some patients may require more intervention to be motivated to engage in their own safety.

Because patient safety was emphasized by the IOM report, efforts to improve the safety climate in the hospital were suggested, such as practices for patient safety and education for health care providers. Most of these efforts are focused on health care providers and lack intervention into the patient's perspective. This may contribute to increasing patients' knowledge gaps throughout their

treatment process. Patient education can help to reduce the patient's knowledge gap and positively affect their attitude toward safety. Thus, health care providers must consider efficient methods for improving motivation of patient behavior, and these efforts should be performed continuously by well-trained health care providers. In addition, providers must consider the effects of education on patient safety while taking into account patient characteristics that might lead to different results in the patients. Furthermore, a patient reporting system may also be considered a method for improving the attitudes of patients toward their safety.

Our study had several strengths. First, we educated patients about safety and evaluated changes in perception and attitude at the patient level. Many previous studies have aimed to evaluate changes in perceptions and attitudes of medical staff. There has been a lack of evidence about change at the patient level. Our study provides valuable results to policy makers and health care providers, which can be used to improve patient safety. Second, to the best of our knowledge, our study was the first to evaluate the effects of

**Table 2** Relationship of patient safety perception and attitude with demographic characteristics(Unit: M, SD, *P*-value)

|                                 | Intervention <sup>a</sup> |             |                 |            |            |                 |
|---------------------------------|---------------------------|-------------|-----------------|------------|------------|-----------------|
|                                 | Perception                |             | <i>P</i> -value | Attitude   |            | <i>P</i> -value |
|                                 | Yes                       | No          |                 | Yes        | No         |                 |
| Marital status                  |                           |             |                 |            |            |                 |
| Single                          | 39.9 ± 6.1                | 32.0 ± 8.6  | 0.3570          | 37.9 ± 4.3 | 32.3 ± 5.9 | 1.0000          |
| Married                         | 38.8 ± 5.8                | 32.8 ± 6.6  |                 | 38.6 ± 3.8 | 33.5 ± 6.4 |                 |
| Education                       |                           |             |                 |            |            |                 |
| High school                     | 40.6 ± 5.1                | 31.0 ± 11.5 | 0.5726          | 36.5 ± 5.8 | 32.0 ± 7.7 | 0.4611          |
| College                         | 39.7 ± 6.2                | 32.2 ± 8.0  |                 | 38.1 ± 4.0 | 32.4 ± 5.7 |                 |
| Rank                            |                           |             |                 |            |            |                 |
| Private                         | 39.9 ± 5.8                | 33.5 ± 7.8  | 0.7129          | 37.7 ± 4.0 | 32.9 ± 6.5 | 0.2030          |
| Private first class             | 39.1 ± 6.0                | 32.2 ± 8.1  |                 | 37.9 ± 4.4 | 32.9 ± 5.3 |                 |
| Corporal                        | 40.0 ± 6.7                | 30.5 ± 8.9  |                 | 38.9 ± 3.7 | 31.2 ± 5.2 |                 |
| Specialist                      | 41.0 ± 5.6                | 35.3 ± 8.3  |                 | 38.7 ± 4.2 | 33.6 ± 6.0 |                 |
| Officer                         | 39.6 ± 6.2                | 30.5 ± 8.4  |                 | 37.2 ± 4.7 | 32.0 ± 7.0 |                 |
| Type of army                    |                           |             |                 |            |            |                 |
| Army                            | 39.8 ± 6.2                | 32.1 ± 8.4  | 0.8618          | 37.9 ± 4.2 | 32.4 ± 5.9 | 0.9507          |
| Air force                       | 39.3 ± 6.2                | 30.6 ± 8.9  |                 | 38.4 ± 4.3 | 32.9 ± 6.9 |                 |
| Navy                            | 39.3 ± 4.6                | 32.1 ± 9.2  |                 | 38.5 ± 4.9 | 32.5 ± 6.3 |                 |
| Medical department              |                           |             |                 |            |            |                 |
| Department of internal medicine | 38.2 ± 6.0                | 29.8 ± 7.6  | 0.6557          | 37.4 ± 4.2 | 27.9 ± 5.0 | 0.0017          |
| Department of surgery           | 40.1 ± 6.1                | 32.5 ± 8.5  |                 | 38.1 ± 4.3 | 33.3 ± 5.7 |                 |
| Surgery                         |                           |             |                 |            |            |                 |
| Yes                             | 40.6 ± 5.8                | 32.8 ± 8.8  | 0.8724          | 37.8 ± 4.7 | 33.6 ± 5.3 | 0.1300          |
| No                              | 39.3 ± 6.2                | 31.7 ± 8.2  |                 | 38.1 ± 4.0 | 31.8 ± 6.1 |                 |
| Prior admission experience      |                           |             |                 |            |            |                 |
| Yes                             | 38.5 ± 5.8                | 29.5 ± 7.9  | 0.3621          | 37.6 ± 4.1 | 31.8 ± 5.9 | 0.5861          |
| No                              | 40.1 ± 6.2                | 32.5 ± 8.5  |                 | 38.1 ± 4.3 | 32.5 ± 5.9 |                 |
| Interest in health information  |                           |             |                 |            |            |                 |
| Low                             | 39.0 ± 6.1                | 32.4 ± 8.4  | 0.0146          | 37.7 ± 4.5 | 32.5 ± 5.5 | 0.6203          |
| High                            | 40.9 ± 5.9                | 31.5 ± 8.5  |                 | 38.4 ± 3.8 | 32.2 ± 6.6 |                 |
| Patient clinical severity       |                           |             |                 |            |            |                 |
| High                            | 37.8 ± 6.6                | 34.0 ± 7.6  | 0.0604          | 37.2 ± 3.3 | 31.5 ± 5.3 | 1.0000          |
| Low                             | 39.9 ± 6.0                | 31.8 ± 8.5  |                 | 38.1 ± 4.3 | 32.5 ± 6.0 |                 |
| Risk of falling                 |                           |             |                 |            |            |                 |
| High                            | 41.6 ± 5.2                | 33.8 ± 6.0  | 0.5200          | 38.3 ± 3.2 | 30.5 ± 4.3 | 0.3454          |
| Low                             | 39.7 ± 6.1                | 31.9 ± 8.6  |                 | 38.0 ± 4.3 | 32.5 ± 6.0 |                 |
| Total                           | 39.8 ± 6.1                | 32.1 ± 8.4  | <0.0001         | 38.0 ± 4.2 | 32.4 ± 5.9 | <0.0001         |

M, mean; SD, standard deviation.

<sup>a</sup>Intervention indicates a patient safety education program in our study. Patients who have received an education program are classified as 'Yes'.

education on changes in perceptions and attitudes in military personnel in Korea. Military personnel are important subjects because education during the service term can have life-long effects. Finally, our results suggested that education at the patient level improves patient safety.

Our study had some limitations. First, we included only one general hospital in the military hospital population, so our results are not representative of the entire military patient population. However, AFCH is the largest hospital in Korea, has an important role in treating patients, and has a case mix of mostly acute patients and high levels of treatment. In addition, the research population lacks generalizability, and the educational effect of older patients with severe illness may vary from patient to patient. Second, our study design could not provide evidence of causality between education and improvement in patient safety. We were unable to administer the survey to the same patients because we could not control patient discharge date and length of stay. It was only possible to administer the survey during specific periods, and

it was administered to different patients based on whether or not they received education. However, we did evaluate a small subset of patients before and after education, and our main findings did not change (Appendix). Third, we could not adjust unmeasured patient clinical or individual characteristics that potentially affect changes in patient safety perceptions and attitudes. Fourth, the survey items were limited compared with other surveys of patient safety. We reviewed previous surveys and changed them for use at the patient level. However, the number of items was limited because we decided that inclusion of many items was not suitable for this survey. We decided to administer a short form survey to achieve higher response rates. Furthermore, we evaluated face validity before conducting the survey, but attitude appeared to have poor validity in our construct validity test. Further studies based on the items with high validity would be needed. Finally, we could not consider health care providers' characteristics. Different levels of skill might have affected patient safety perceptions and attitudes. In addition, since Korea has a military system based on

**Table 3** The association between education and patient safety perception and attitude(Unit: estimation, SD, *P*-value)

|                                 | Patient safety |       |         |          |       |         |
|---------------------------------|----------------|-------|---------|----------|-------|---------|
|                                 | Perception     |       |         | Attitude |       |         |
| Intervention                    |                |       |         |          |       |         |
| Yes                             | 7.809          | 0.652 | <0.0001 | 5.539    | 0.454 | <0.0001 |
| No                              | Ref            | –     | –       | Ref      | –     | –       |
| Age                             | 0.122          | 0.084 | 0.1444  | 0.008    | 0.058 | 0.8847  |
| Marital status                  |                |       |         |          |       |         |
| Single                          | 0.263          | 1.741 | 0.8798  | –2.683   | 1.212 | 0.0269  |
| Married                         | Ref            | –     | –       | Ref      | –     | –       |
| Education                       |                |       |         |          |       |         |
| High school                     | –0.041         | 1.101 | 0.9704  | –0.859   | 0.766 | 0.2623  |
| College                         | Ref            | –     | –       | Ref      | –     | –       |
| Rank                            |                |       |         |          |       |         |
| Private                         | 2.181          | 1.370 | 0.1115  | 2.390    | 0.954 | 0.0122  |
| Private first class             | 1.323          | 1.255 | 0.2918  | 2.167    | 0.874 | 0.0132  |
| Corporal                        | 0.809          | 1.316 | 0.5386  | 1.850    | 0.916 | 0.0434  |
| Specialist                      | 4.047          | 1.431 | 0.0047  | 3.194    | 0.996 | 0.0013  |
| Officer                         | Ref            | –     | –       | Ref      | –     | –       |
| Type of army                    |                |       |         |          |       |         |
| Army                            | 0.274          | 1.546 | 0.8594  | –0.409   | 1.076 | 0.7036  |
| Air force                       | –0.980         | 2.215 | 0.6582  | –0.126   | 1.542 | 0.9349  |
| Navy                            | Ref            | –     | –       | Ref      | –     | –       |
| Medical department              |                |       |         |          |       |         |
| Department of internal medicine | –2.519         | 0.978 | 0.01    | –3.003   | 0.681 | <.0001  |
| Department of surgery           | Ref            | –     | –       | Ref      | –     | –       |
| Length of stay                  | 0.031          | 0.059 | 0.6047  | –0.028   | 0.041 | 0.4983  |
| Surgery                         |                |       |         |          |       |         |
| Yes                             | 0.686          | 0.755 | 0.3635  | 0.147    | 0.526 | 0.7793  |
| No                              | Ref            | –     | –       | Ref      | –     | –       |
| Prior admission experience      |                |       |         |          |       |         |
| Yes                             | –2.681         | 0.925 | 0.0037  | –0.060   | 0.644 | 0.9261  |
| No                              | Ref            | –     | –       | Ref      | –     | –       |
| Interest in health information  |                |       |         |          |       |         |
| Low                             | –0.583         | 0.699 | 0.4038  | –0.424   | 0.487 | 0.3835  |
| High                            | Ref            | –     | –       | Ref      | –     | –       |
| Patient clinical severity       |                |       |         |          |       |         |
| High                            | 0.257          | 1.401 | 0.8545  | 0.237    | 0.976 | 0.8082  |
| Low                             | Ref            | –     | –       | Ref      | –     | –       |
| Risk of falling                 |                |       |         |          |       |         |
| High                            | 3.428          | 1.775 | 0.0534  | 0.058    | 1.236 | 0.9625  |
| Low                             | Ref            | –     | –       | Ref      | –     | –       |

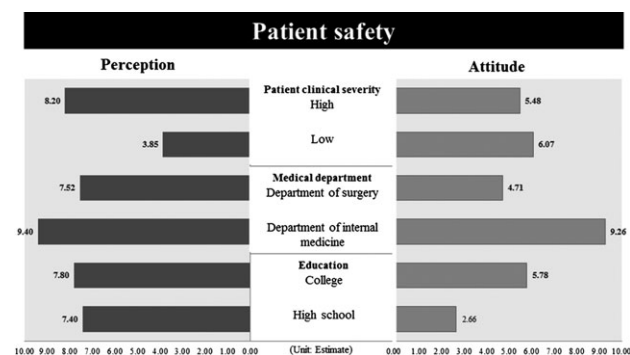

**Figure 1** The results of the subgroup analysis of the effect of education on patient perceptions and attitudes, by patient clinical severity, medical department and education. \*Note: The results indicate scores for respondents who received patient safety education compared with those of respondents who did not receive safety education. \*Bold font indicates a statistically significant result ( $P < 0.05$ ).

conscription, other countries that adopt other military systems may be different. Further studies that control these factors should be performed.

In conclusion, our study results suggested that education was important for improving patient perceptions and attitudes about their own safety while in the hospital. To improve patient engagement, efficient educational methods and methods to encourage motivation are needed. Specialized health care providers should provide education at the level of the patient to achieve improvements in the patient safety climate. Finally, more patient-level studies are needed to improve patient engagement and provide adequate evidence in this area.

### Supplementary material

Supplementary material is available at *International Journal for Quality in Health Care* online.

## References

- Stelfox HT, Palmisani S, Scurlock C *et al.* The 'To Err is Human' report and the patient safety literature. *Qual Saf Health Care* 2006;15:174–8.
- Brennan TA. The Institute of Medicine report on medical errors—could it do harm? *N Engl J Med* 2000;342:1123–5.
- Kirk S, Parker D, Claridge T *et al.* Patient safety culture in primary care: developing a theoretical framework for practical use. *Qual Saf Health Care* 2007;16:313–20.
- Runciman W, Hibbert P, Thomson R *et al.* Towards an International Classification for Patient Safety: key concepts and terms. *Int J Qual Health Care* 2009;21:18–26.
- Singer S, Meterko M, Baker L *et al.* Workforce perceptions of hospital safety culture: development and validation of the patient safety climate in healthcare organizations survey. *Health Serv Res* 2007;42:1999–2021.
- Sorra JS, Dyer N. Multilevel psychometric properties of the AHRQ hospital survey on patient safety culture. *BMC Health Serv Res* 2010;10:1.
- Dy SM, Chan KS, Chang H-Y *et al.* Patient perspectives of care and process and outcome quality measures for heart failure admissions in US hospitals: how are they related in the era of public reporting? *Int J Qual Health Care* 2016;28:522–8.
- Modak I, Sexton JB, Lux TR *et al.* Measuring safety culture in the ambulatory setting: the safety attitudes questionnaire—ambulatory version. *J Gen Int Med* 2007;22:1–5.
- Gabrani A, Hoxha A, Simaku A *et al.* Application of the Safety Attitudes Questionnaire (SAQ) in Albanian hospitals. *Europ J Public Health* 2015; 25:ckv176. 062.
- Snowdon DA, Hau R, Leggat SG *et al.* Does clinical supervision of health professionals improve patient safety? A systematic review and meta-analysis. *Int J Qual Health Care* 2016;28:447–55.
- Longtin Y, Sax H, Leape LL *et al.* Patient participation: current knowledge and applicability to patient safety. *Mayo Clin Proc* 2010;85:53–62.
- Harrison R, Walton M, Manias E *et al.* The missing evidence: a systematic review of patients' experiences of adverse events in health care. *Int J Qual Health Care* 2016;27:424–42.
- Kitson A, Marshall A, Bassett K *et al.* What are the core elements of patient-centred care? A narrative review and synthesis of the literature from health policy, medicine and nursing. *J Adv Nurs* 2013;69:4–15.
- Mead N, Bower P. Patient-centred consultations and outcomes in primary care: a review of the literature. *Patient Educ Couns* 2002;48:51–61.
- Anderson RM, Funnell MM. Patient empowerment: myths and misconceptions. *Patient Educ Couns* 2010;79:277–82.
- Lampert A, Wien K, Haefeli WE *et al.* Guidance on how to achieve comprehensible patient information leaflets in four steps. *Int J Qual Health Care* 2016;28:634–8.
- Weingart SN, Toth M, Eneman J *et al.* Lessons from a patient partnership intervention to prevent adverse drug events. *Int J Qual Health Care* 2004;16:499–507.
- Pain C, Green M, Duff C *et al.* Between the flags: implementing a safety-net system at scale to recognise and manage deteriorating patients in the New South Wales Public Health System. *Int J Qual Health Care* 2016: 1–7.
- McGuckin M, Waterman R, Storr J *et al.* Evaluation of a patient-empowering hand hygiene programme in the UK. *J Hosp Infect* 2001;48:222–7.
- Funnell MM, Anderson RM. Empowerment and self-management of diabetes. *Clin Diabetes* 2004;22:123–7.
- Viklund G, Örtqvist E, Wikblad K. Assessment of an empowerment education programme. A randomized study in teenagers with diabetes. *Diabetic Med* 2007;24:550–6.
- Wong C, Wong W, Wan Y *et al.* Effect of a structured diabetes education programme in primary care on hospitalizations and emergency department visits among people with Type 2 diabetes mellitus: results from the Patient Empowerment Programme. *Diabetic Med* 2015;33:1427–36.
- Roberts BW, Kuncel NR, Shiner R *et al.* The power of personality: the comparative validity of personality traits, socioeconomic status, and cognitive ability for predicting important life outcomes. *Perspect Psychol Sci* 2007;2:313–45.
- Pflanz SE, Ogle AD. Job stress, depression, work performance, and perceptions of supervisors in military personnel. *Mil Med* 2006;171: 861–5.
- Choi JW, Park CS. Development and Verification of Questionnaire for Measurement of Safety Perception and Attitude in Construction. *J Korean Soc Saf* 2013;28:31–7.
- Colla J, Bracken A, Kinney L *et al.* Measuring patient safety climate: a review of surveys. *Qual Saf Health Care* 2005;14:364–6.
- Sexton JB, Helmreich RL, Neilands TB *et al.* The Safety Attitudes Questionnaire: psychometric properties, benchmarking data, and emerging research. *BMC Health Serv Res* 2006;6:1.
- Kerfoot BP, Conlin PR, Trivison T *et al.* Patient safety knowledge and its determinants in medical trainees. *J Gen Int Med* 2007;22:1150–4.
- Tang H. An inventory of organizational innovativeness. *Technovation* 1998;19:41–51.
- Hu Lt, Bentler PM. Cutoff criteria for fit indexes in covariance structure analysis: conventional criteria versus new alternatives. *Struct Equ Model* 1999;6:1–55.
- Sun J. Assessing goodness of fit in confirmatory factor analysis. *Meas Eval Couns Dev* 2005;37:240.
- Joo KE. Accessing factor structure and construct validity of the successful aging inventory. *J Korean Acad Nurs* 2013;43:568–78.
- Makary MA, Daniel M. Medical error—the third leading cause of death in the US. *Br Med J* 2016;353:i2139.
- Brody DS, Miller SM, Lerman CE *et al.* Patient perception of involvement in medical care. *J Gen Int Med* 1989;4:506–11.
- Johnstone M-J, Kanitsaki O. Engaging patients as safety partners: some considerations for ensuring a culturally and linguistically appropriate approach. *Health Policy* 2009;90:1–7.
- Davis RE, Jacklin R, Sevdalis N *et al.* Patient involvement in patient safety: what factors influence patient participation and engagement? *Health Expect* 2007;10:259–67.
- Davis R, Sevdalis N, Vincent C. Patient involvement in patient safety: how willing are patients to participate? *BMJ Qual Saf* 2011;20:108–14.
- Veltkamp M, Aarts H, Custers R. Perception in the service of goal pursuit: motivation to attain goals enhances the perceived size of goal-instrumental objects. *Soc Cogn* 2008;26:720.
- Korcarz CE, DeCara JM, Hirsch AT *et al.* Ultrasound detection of increased carotid intima-media thickness and carotid plaque in an office practice setting: does it affect physician behavior or patient motivation? *J Am Soc Echocardiogr* 2008;21:1156–62.
